# Supplementary material for: Distinct neuron phenotypes may serve object feature sensing in the electrosensory lobe of Gymnotus omarorum
Source: Oxford University Press journal article supplement (doi:10.1242/jeb.242242), 2021-03-11
Supplement: jeb242242supp.pdf [file jeb242242supp.pdf]

Table 1. Non significant difference between orientation planes were found in the number of perisomatic dendrites

| Number of perisomatic dendrites |                             |      |      |            |      |      |              |
|---------------------------------|-----------------------------|------|------|------------|------|------|--------------|
| Type of Pyramidal cell          | Orientation (section plane) |      |      |            |      |      | Ranksum test |
|                                 | Longitudinal                |      |      | Transverse |      |      |              |
|                                 | N                           | mean | s.d. | N          | mean | s.d. | p value      |
| <b>Basilar</b>                  | 8.0                         | 4.9  | 2.4  | 13.0       | 6.2  | 3.6  | 1.0          |
| <b>Non-Basilar</b>              | 8.0                         | 7.6  | 3.0  | 6.0        | 6.2  | 4.2  | 1.0          |

Table 2 Marginal difference between orientation planes were found in the length of perisomatic dendrites (Significance after Holm-Bonferroni correction, 0.06)

| Length of perisomatic dendrites |                             |      |      |            |      |      |              |
|---------------------------------|-----------------------------|------|------|------------|------|------|--------------|
| Type of Pyramidal cell          | Orientation (section plane) |      |      |            |      |      | Ranksum test |
|                                 | Longitudinal                |      |      | Transverse |      |      |              |
|                                 | N                           | mean | s.d. | N          | mean | s.d. | p value      |
| <b>Basilar</b>                  | 8.0                         | 33.7 | 17.8 | 13.0       | 25.2 | 10.7 | 0.474        |
| <b>Non-Basilar</b>              | 8.0                         | 34.4 | 18.6 | 6.0        | 26.7 | 16.5 | 0.029        |

Table 3 Non significant difference between orientation planes were found in the number of apical dendrites

| Number of Apical Dendrites |                             |      |      |            |      |      |              |
|----------------------------|-----------------------------|------|------|------------|------|------|--------------|
| Type of Pyramidal cell     | Orientation (section plane) |      |      |            |      |      | Ranksum test |
|                            | Longitudinal                |      |      | Transverse |      |      |              |
|                            | N                           | mean | s.d. | N          | mean | s.d. | p value      |
| <b>Basilar</b>             | 8.0                         | 2.4  | 0.7  | 13.0       | 3.6  | 5.6  | 1.0          |
| <b>Non-Basilar</b>         | 8.0                         | 2.0  | 1.1  | 6.0        | 1.2  | 0.4  | 1.0          |

Table 4. Significant difference between orientation planes were found in the angles between daughter apical dendrites (Significance after Bonferroni correction, 0.0002)

| <b>Bifurcation Angle of Apical Dendrites</b> |                                    |             |             |                   |             |             |                     |
|----------------------------------------------|------------------------------------|-------------|-------------|-------------------|-------------|-------------|---------------------|
| <b>Type of Pyramidal cell</b>                | <b>Orientation (section plane)</b> |             |             |                   |             |             | <b>Ranksum test</b> |
|                                              | <b>Longitudinal</b>                |             |             | <b>Transverse</b> |             |             |                     |
|                                              | <b>N</b>                           | <b>mean</b> | <b>s.d.</b> | <b>N</b>          | <b>mean</b> | <b>s.d.</b> | <b>p value</b>      |
| <b>Basilar</b>                               | 8.0                                | 60.4        | 10.9        | 13.0              | 33.3        | 8.5         | p<0.0001            |
| <b>Non-Basilar</b>                           | 8.0                                | 65.7        | 14.1        | 6.0               | 37.0        | 11.4        | p<0.0001            |

Table 5 Significant difference between orientation planes were found in the extension of the apical dendritic tree (Significance after Bonferroni correction, 0.002)

| <b>Total Width of Apical Dendritic Tree</b> |                                    |             |             |                   |             |             |                     |
|---------------------------------------------|------------------------------------|-------------|-------------|-------------------|-------------|-------------|---------------------|
| <b>Type of Pyramidal cell</b>               | <b>Orientation (section plane)</b> |             |             |                   |             |             | <b>Ranksum test</b> |
|                                             | <b>Longitudinal</b>                |             |             | <b>Transverse</b> |             |             |                     |
|                                             | <b>N</b>                           | <b>mean</b> | <b>s.d.</b> | <b>N</b>          | <b>mean</b> | <b>s.d.</b> | <b>p value</b>      |
| <b>Basilar</b>                              | 8.0                                | 217.6       | 113.4       | 13.0              | 61.9        | 25.4        | 0.00075             |
| <b>Non-Basilar</b>                          | 8.0                                | 194.5       | 73.0        | 6.0               | 62.5        | 23.3        | 0.001               |
